# Supplementary material for: Akkermansia muciniphila ameliorates the age-related decline in colonic mucus thickness and attenuates immune activation in accelerated aging Ercc1−/Δ7 mice
Source: PubMed Central journal article supplement (PMC6408808; doi:10.1186/s12979-019-0145-z), 2019-03-08

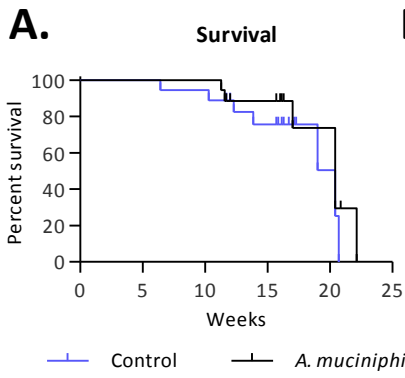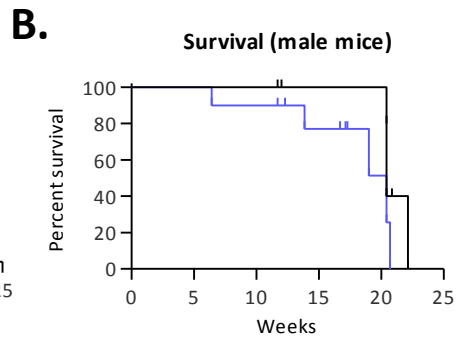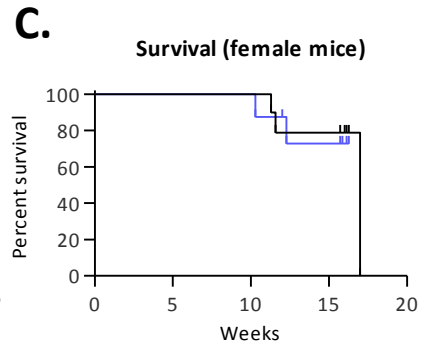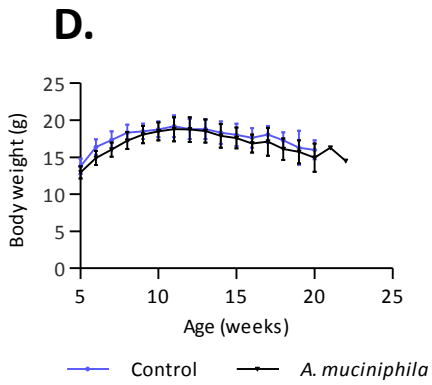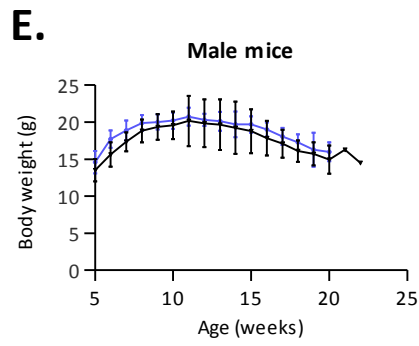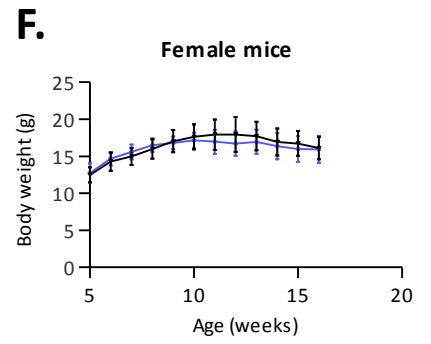

Supplement: 12979_2019_145_MOESM4_ESM.pdf [file 12979_2019_145_MOESM4_ESM.pdf]
